# Supplementary material for: Host-Mycobacterium avium subsp. paratuberculosis interactome reveals a novel iron assimilation mechanism linked to nitric oxide stress during early infection
Source: PubMed Central journal article supplement (PMC3832399; doi:10.1186/1471-2164-14-694), 2013-10-10

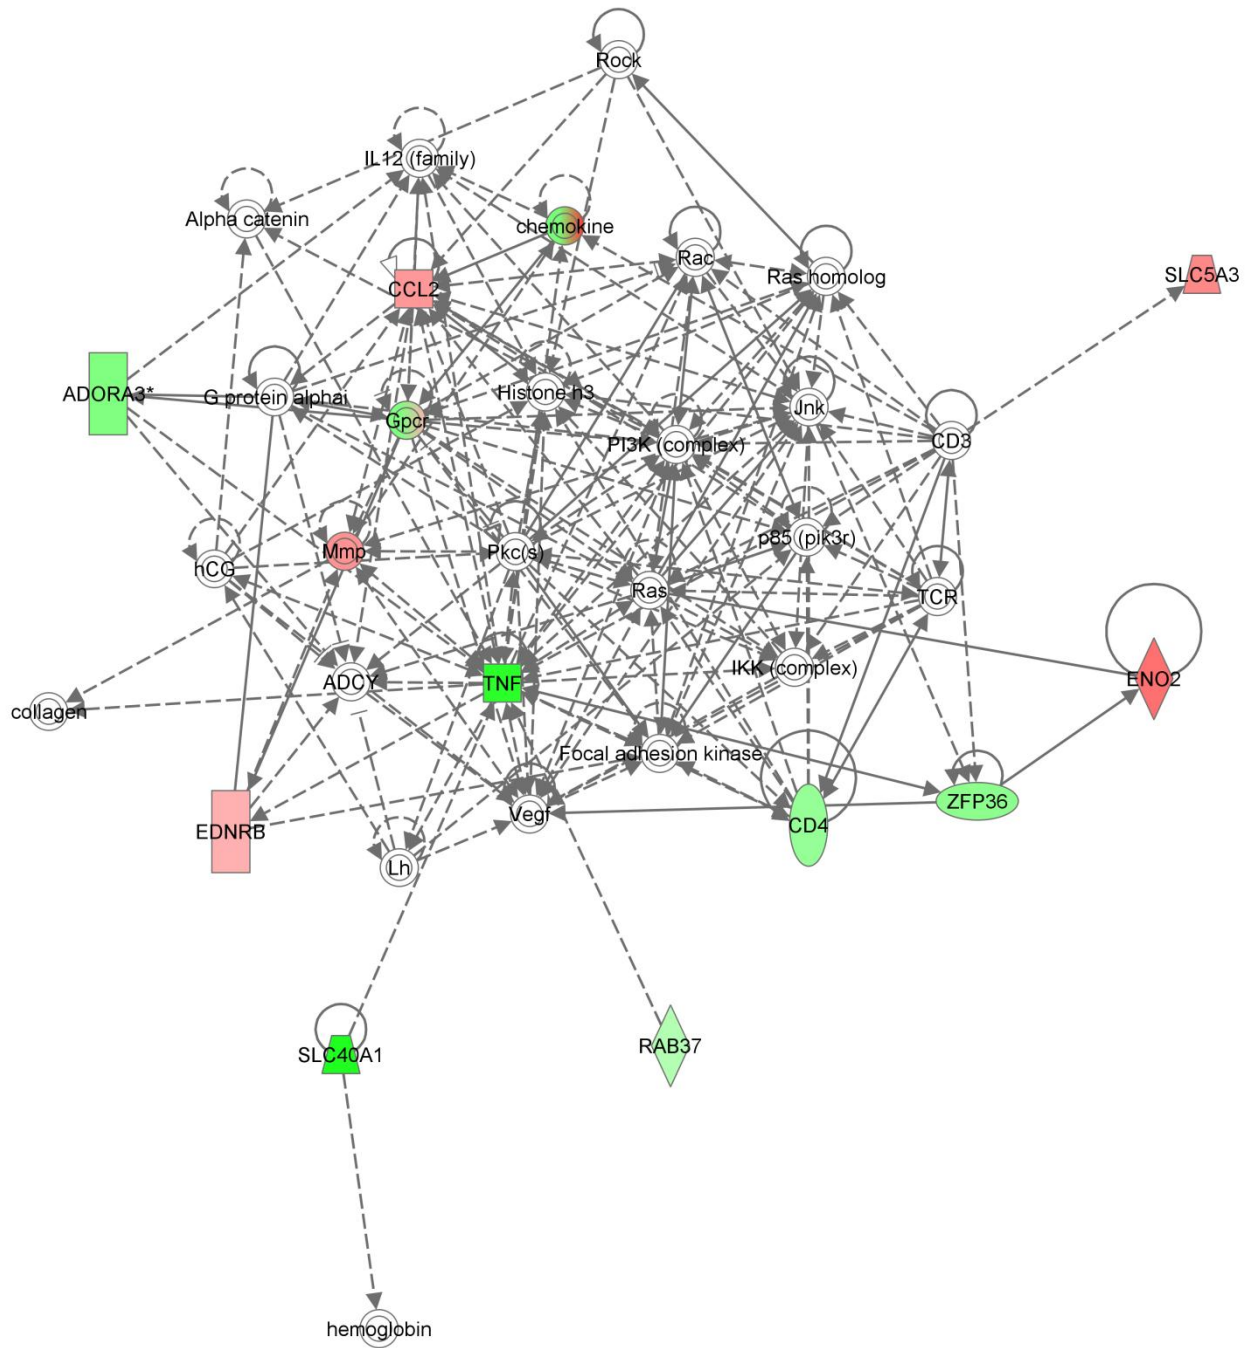

Supplement: 1471-2164-14-694-S8.pdf [file 1471-2164-14-694-S8.pdf]
